# Supplementary material
Source: publisher figshare collection journal article supplement (https://acs.figshare.com/ndownloader/files/4155538)
Supplement: Supplementary file 1 [file 4155538]

## **SUPPORTING INFORMATION**

### **Bisphenol S in Urine from the United States and Seven Asian Countries: Occurrence and Human Exposures**

**Chunyang Liao<sup>a, b</sup>, Fang Liu<sup>a</sup>, Husam Alomirah<sup>c</sup>, Vu Duc Loi<sup>d</sup>, Mustafa Ali Mohd<sup>e</sup>,  
Hyo-Bang Moon<sup>f</sup>, Haruhiko Nakata<sup>g</sup>, and Kurunthachalam Kannan<sup>a, h, \*</sup>**

<sup>a</sup> Wadsworth Center, New York State Department of Health, and Department of Environmental Health Sciences, School of Public Health, State University of New York at Albany, Empire State Plaza, P.O. Box 509, Albany, New York 12201-0509

<sup>b</sup> Key Laboratory of Coastal Zone Environmental Processes, Yantai Institute of Coastal Zone Research (YIC), Chinese Academy of Sciences (CAS); Shandong Provincial Key Laboratory of Coastal Zone Environmental Processes, YICCAS, Yantai, Shandong 264003, China

<sup>c</sup> Biotechnology Department, Kuwait Institute for Scientific Research, P.O. Box 24885, 13109 Safat, Kuwait

<sup>d</sup> Institute of Chemistry, Vietnam Academy of Science and Technology, 18 Hoang Quoc Viet Street, Hanoi, Vietnam

<sup>e</sup> Faculty of Medicine, University of Malaya, Kuala Lumpur, Malaysia

<sup>f</sup> Department of Environmental Marine Sciences, College of Science and Technology, Hanyang University, Ansan 426-791, South Korea

<sup>g</sup> Graduate School of Science & Technology, Kumamoto University, 2-39-1 Kurokami, Kumamoto 860-8555, Japan

<sup>h</sup> International Joint Research Center for Persistent Toxic Substances, State Key Laboratory of Urban Water Resource and Environment, Harbin Institute of Technology, Harbin 150090, China

\*Corresponding author: K. Kannan  
Wadsworth Center  
Empire State Plaza, P.O. Box 509  
Albany, NY 12201-0509

Tel: 1-518-474-0015  
Fax: 1-518-473-2895  
E-mail: [kkannan@wadsworth.org](mailto:kkannan@wadsworth.org)

**For submission to: Environmental Science and Technology**

**Pages: 5**

**Figures: 1**

**Tables: 2**

**Table S1.** Details of urine samples analyzed in this study.

|                           | Male | Female | Age group            |            |           |          |           | Average age<br>(years) |
|---------------------------|------|--------|----------------------|------------|-----------|----------|-----------|------------------------|
|                           |      |        | ≤ 19                 | 20–29      | 30–39     | 40–49    | ≥ 50      |                        |
| <b>USA</b>                | 21   | 10     | 2 (2/0) <sup>a</sup> | 5 (2/3)    | 7 (5/2)   | 9 (7/2)  | 8 (5/3)   | 39.4 ± 12.8            |
| <b>China</b>              | 47   | 42     | 13 (8/5)             | 36 (20/16) | 16 (6/10) | 12 (5/7) | 12 (8/4)  | 32.0 ± 16.9            |
| <b>India</b> <sup>b</sup> | 23   | 15     | 2 (1/1)              | 6 (5/1)    | 6 (2/4)   | 9 (5/4)  | 11 (6/5)  | 43.0 ± 18.0            |
| <b>Japan</b>              | 28   | 8      | 1 (1/0)              | 14 (9/5)   | 15 (12/3) | 4 (4/0)  | 2 (2/0)   | 31.7 ± 10.4            |
| <b>Korea</b> <sup>c</sup> | 7    | 13     | 0 (0/0)              | 5 (2/3)    | 5 (1/4)   | 7 (3/4)  | 3 (1/2)   | 39.6 ± 12.3            |
| <b>Kuwait</b>             | 3    | 27     | 15 (1/14)            | 1 (0/1)    | 3 (0/3)   | 1 (0/1)  | 10 (2/8)  | 29.5 ± 21.1            |
| <b>Malaysia</b>           | 10   | 19     | 0 (0/0)              | 19 (3/16)  | 5 (5/0)   | 4 (2/2)  | 1 (0/1)   | 29.6 ± 9.14            |
| <b>Vietnam</b>            | 13   | 16     | 0 (0/0)              | 4 (3/1)    | 5 (3/2)   | 6 (3/3)  | 14 (4/10) | 49.5 ± 17.2            |

<sup>a</sup>: number of samples (male/female); <sup>b</sup>: ages of four samples from India are not available;

<sup>c</sup>: gender and age of 13 samples from Korea are not available.

**Table S2.** Pearson correlation between urinary unadjusted (ng/mL) and creatinine-adjusted BPS concentrations (µg/g Cre).

|                                                    | USA    | China  | India  | Japan  | Korea  | Kuwait | Malaysia | Vietnam | All    |
|----------------------------------------------------|--------|--------|--------|--------|--------|--------|----------|---------|--------|
| <b>Pearson correlation coefficients (<i>r</i>)</b> | .994** | .406** | .548** | .715** | .995** | .943** | .164     | .630**  | .695** |
| <b>Sig. (2-tailed)</b>                             | .000   | .000   | .000   | .000   | .000   | .000   | .394     | .000    | .000   |

\*\*, Correlation is significant at the 0.01 level (2-tailed). Pearson correlation analysis was performed with SPSS 17.0.

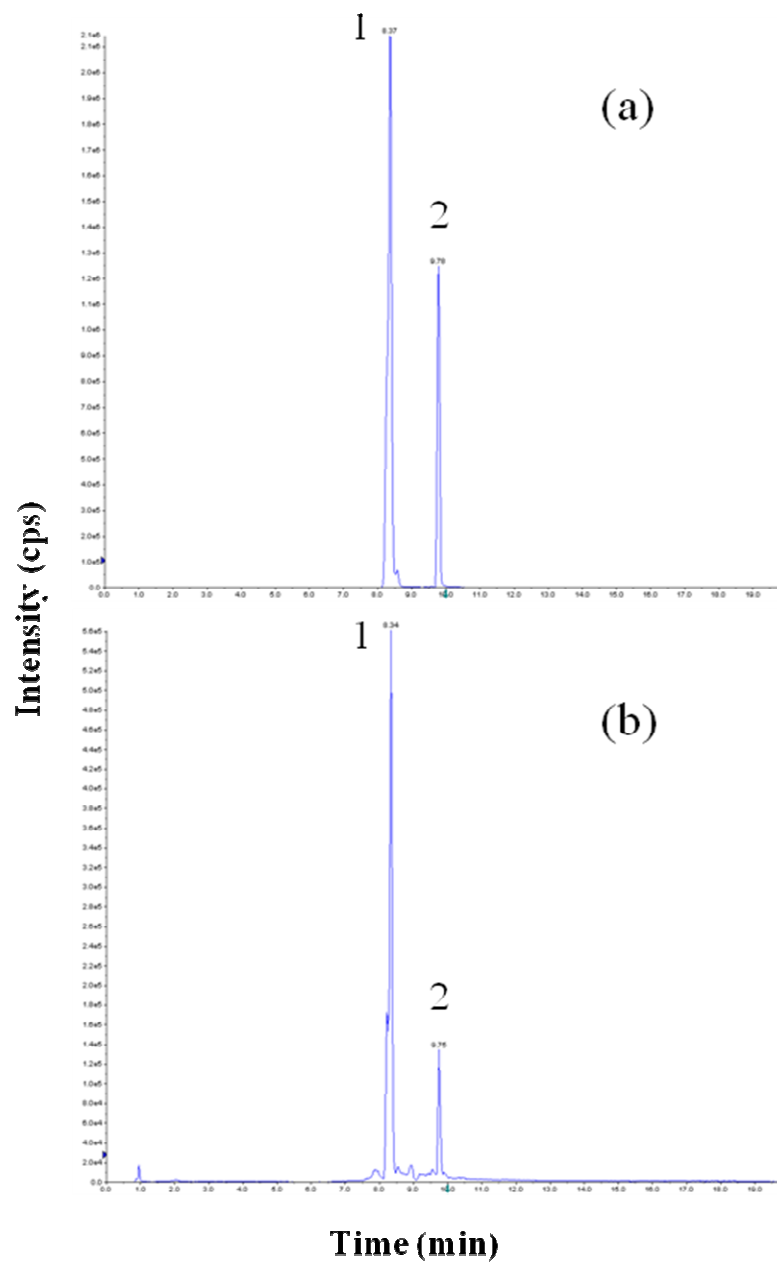

**Figure S1.** Representative total ion chromatograms (TIC) of a 5 ng/mL of standard mixture (a) and a real urine sample (b) injected (10 µL) into HPLC-MS/MS. 1 = BPS, 2 =  $^{13}\text{C}_{12}$ -BPA.
